# Supplementary material
Source: ML conference proceedings conference paper supplement (https://proceedings.mlr.press/v139/deecke21a.html)
Supplement: Supplementary file [file deecke21a-supp.pdf]

---

## Supplementary Material: Transfer-Based Semantic Anomaly Detection

---

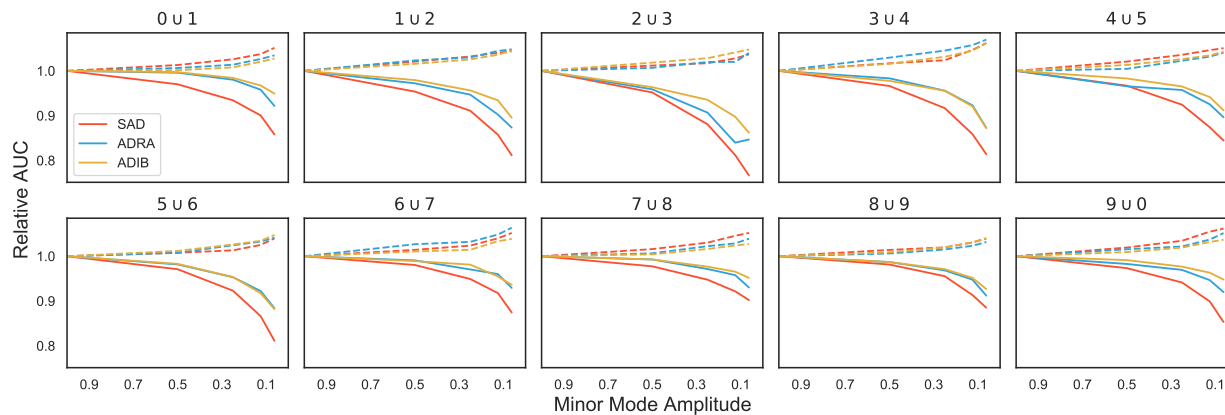

### Robustness to Small Modes

Displayed are pairs  $(y_a, y_b) = (\text{"airplane"}, \text{"automobile"})$ ,  $(y_a, y_b) = (\text{"automobile"}, \text{"bird"})$ , *etc.* for the robustness trials of Section 5.4. ADRA and ADIB consistently obtain higher robustness on examples from the minority class  $y_b$ .
